# Supplementary figures and images for: Cardiopulmonary function in adolescent patients with pectus excavatum or carinatum
Source: HighWire-hosted journal article supplement (doi:10.1136/bmjresp-2021-001020), 2021-07-01

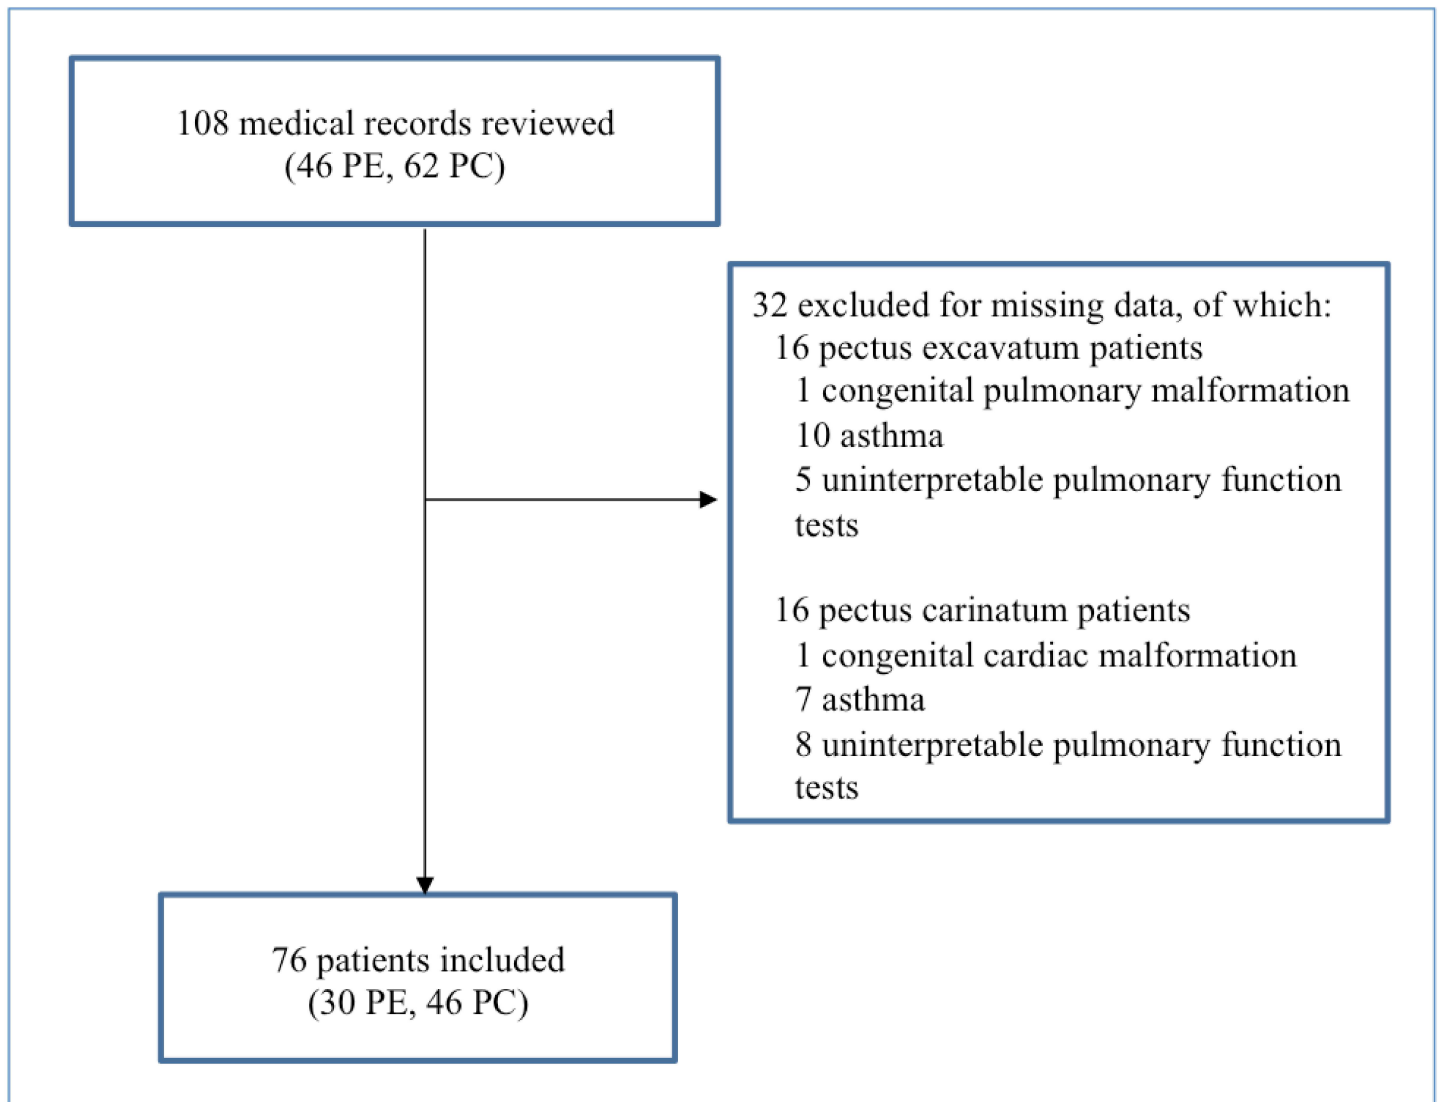

Supplement: bmjresp-2021-001020supp001_data_supplement.pdf [file bmjresp-2021-001020supp001_data_supplement.pdf]
